# Supplementary material for: Preindustrial to present-day changes in tropospheric hydroxyl radical and methane lifetime from the Atmospheric Chemistry and Climate Model Intercomparison Project (ACCMIP)
Source: Copernicus journal article supplement (doi:10.5194/acp-13-5277-2013), 2013-05-27

## Supplementary Tables and Figures

**Table S1.** Source-wise emissions of NO<sub>x</sub>, CO and NMVOCs for the year 2000 implemented in the ACCMIP models. Anthropogenic emissions include emissions from anthropogenic sources, biomass burning, shipping, and aircraft (for NO<sub>x</sub> only). A cell with n/a means that the quantity was not available.

| Models             | NO <sub>x</sub> (Tg N yr <sup>-1</sup> ) |           |      |       | CO (Tg CO yr <sup>-1</sup> ) |                  |       |       | NMVOCs (Tg C yr <sup>-1</sup> ) |                  |       |       |
|--------------------|------------------------------------------|-----------|------|-------|------------------------------|------------------|-------|-------|---------------------------------|------------------|-------|-------|
|                    | Anthro                                   | Lightning | Soil | Total | Anthro                       | Biogenic         | Ocean | Total | Anthro                          | Biogenic         | Ocean | Total |
| CESM-CAM-superfast | 38.8                                     | 4.2       | 4.9  | 47.9  | 1073                         | 176 <sup>c</sup> | -     | 1249  | 0                               | 429              | 0     | 429   |
| CICERO-OsloCTM2    | 37.7                                     | 5.0       | 8.0  | 50.7  | 1070                         | 160              | 20    | 1250  | 65                              | 396              | 0     | 462   |
| CMAM               | 37.7                                     | 3.8       | 9.3  | 50.8  | 1073                         | 410              | 20    | 1503  | 0                               | 0                | 0     | 0     |
| EMAC               | 38.0                                     | 5.7       | 3.6  | 47.3  | 1065                         | 113 <sup>c</sup> | -     | 1178  | 161                             | 419              | 0     | 580   |
| GEOSCCM            | 33.0 <sup>a</sup>                        | 5.0       | 7.2  | 45.2  | 1071                         | 166              | 0     | 1237  | 72                              | 556              | 0     | 628   |
| GFDL-AM3           | 38.3                                     | 4.4       | 3.6  | 46.3  | 1071                         | 159              | 20    | 1250  | 91                              | 737              | 4     | 833   |
| GISS-E2-R          | 38.2                                     | 7.7       | 2.7  | 48.6  | 1072                         | 0                | 0     | 1072  | 78                              | 753              | 0     | 830   |
| GISS-E2-R-TOMAS    | 38.3                                     | 7.2       | 2.7  | 48.2  | 1069                         | 0                | 0     | 1069  | 77                              | 764              | 0     | 841   |
| HadGEM2            | 37.3                                     | 1.2       | 5.6  | 44.1  | 1068                         | 475              | 45    | 1588  | 104                             | 0                | 0     | 104   |
| LMDzORINCA         | 38.2                                     | 5.9       | 8.7  | 52.8  | 1068                         | 0                | 20    | 1088  | 122                             | 535              | 0     | 657   |
| MIROC-CHEM         | n/a                                      | 9.7       | n/a  | 47.8  | n/a                          | 0                | n/a   | 1068  | 212                             | 624              | 0     | 836   |
| MOCAGE             | 38.2                                     | 5.2       | 4.5  | 47.9  | 609                          | 560 <sup>c</sup> | -     | 1170  | 98                              | 962 <sup>c</sup> | -     | 1060  |
| NCAR-CAM3.5        | 39.1                                     | 4.1       | 4.9  | 48.0  | 1073                         | 176 <sup>c</sup> | -     | 1249  | 114                             | 554              | 0     | 668   |
| STOC-HadAM3        | 38.2                                     | 7.2       | 5.6  | 50.9  | 1068                         | 75               | 25    | 1168  | 136                             | 576              | 0     | 712   |
| TM5 <sup>b</sup>   | 38.5                                     | 6.0       | 5.0  | 49.5  | 1085                         | 76               | 20    | 1181  | 113                             | 506              | 3     | 622   |
| UM-CAM             | 36.4                                     | 5.1       | 7.0  | 48.5  | 1053                         | 100 <sup>c</sup> | -     | 1153  | 149                             | 374              | 0     | 523   |

<sup>a</sup> Shipping emissions were not included in the model

<sup>b</sup> Base year is 2006

<sup>c</sup> Oceanic emission totals are included

**Table S2.** The expression for temperature-dependent rate coefficient ( $k_{CH_4+OH}$ ) for methane oxidation implemented in the models and its global annual mean value for 1850, 1980, and 2000 time-slices. Multi-model mean (MMM) with standard deviation (STD) and coefficient of variation (CV) are shown in the last two rows.

| Models             | Expression for $k_{CH_4+OH}$                     | $k_{CH_4+OH}$ ( $10^{-5} \text{ cm}^3 \text{ molec}^{-1} \text{ s}^{-1}$ ) |           |           |
|--------------------|--------------------------------------------------|----------------------------------------------------------------------------|-----------|-----------|
|                    |                                                  | 1850                                                                       | 1980      | 2000      |
| CESM-CAM-superfast | $2.45 \times 10^{-12} \exp(-1775/T)$             | 3.046                                                                      | 3.101     | 3.144     |
| CICERO-OsloCTM2    | $2.45 \times 10^{-12} \exp(-1775/T)$             | 3.085                                                                      | 3.085     | 3.085     |
| CMAM               | $2.45 \times 10^{-12} \exp(-1775/T)$             | 3.036                                                                      | 3.075     | 3.120     |
| EMAC               | $1.85 \times 10^{-12} * T^{2.82} \exp(-987/T)$   | 3.037                                                                      | 3.057     | 3.099     |
| GEOSCCM            | $2.80 \times 10^{-14} * T^{0.667} \exp(-1575/T)$ | 3.062                                                                      | 3.092     | 3.130     |
| GFDL-AM3           | $2.45 \times 10^{-12} \exp(-1775/T)$             | 2.999                                                                      | 2.999     | 3.038     |
| GISS-E2-R          | $2.45 \times 10^{-12} \exp(-1775/T)$             | 3.016                                                                      | 3.050     | 3.083     |
| GISS-E2-R-TOMAS    | $2.45 \times 10^{-12} \exp(-1775/T)$             | 2.996                                                                      | 3.040     | 3.083     |
| HadGEM2            | $2.45 \times 10^{-12} \exp(-1775/T)$             | 3.022                                                                      | 3.026     | 3.061     |
| LMDzORINCA         | $2.45 \times 10^{-12} \exp(-1775/T)$             | 2.997                                                                      | 3.025     | 3.053     |
| MIROC-CHEM         | $2.45 \times 10^{-12} \exp(-1775/T)$             | 2.937                                                                      | 2.991     | 2.991     |
| MOCAGE             | $2.45 \times 10^{-12} \exp(-1775/T)$             | 2.966                                                                      | 3.004     | 3.027     |
| NCAR-CAM3.5        | $2.45 \times 10^{-12} \exp(-1775/T)$             | 2.975                                                                      | 3.002     | 3.052     |
| STOC-HadAM3        | $2.45 \times 10^{-12} \exp(-1775/T)$             | 2.964                                                                      | 2.980     | 3.011     |
| TM5                | $2.45 \times 10^{-12} \exp(-1775/T)$             | 3.098                                                                      | ***       | 3.098     |
| UM-CAM             | $1.85 \times 10^{-12} \exp(-1690/T)$             | 3.039                                                                      | 3.050     | 3.083     |
| MMM±STD            |                                                  | 3.02±0.04                                                                  | 3.04±0.04 | 3.07±0.04 |
| CV (%)             |                                                  | 1.5                                                                        | 1.3       | 1.4       |

**Table S3.** Methane lifetime calculated as global burden of methane divided by tropospheric methane loss flux with the tropopause defined as air with ozone concentrations less than or equal to 150 ppbv in the 1850 time-slice simulation. Multi-model mean (MMM) with standard deviation (STD) and coefficient of variation (CV) are shown in the last two rows.

| <b>Models</b>      | <b><math>\tau_{\text{CH}_4}</math> (years)</b> |                |               |
|--------------------|------------------------------------------------|----------------|---------------|
|                    | <b>1850</b>                                    | <b>1980</b>    | <b>2000</b>   |
| CESM-CAM-superfast | 9.2                                            | 8.7            | 8.3           |
| CICERO-OsloCTM2    | 9.0                                            | 10.0           | 9.9           |
| CMAM               | 8.7                                            | 9.6            | 9.4           |
| EMAC               | 8.8                                            | 9.4            | 9.0           |
| GEOSCCM            | 8.5                                            | 9.6            | 9.5           |
| GFDL-AM3           | 8.8                                            | 9.6            | 9.3           |
| GISS-E2-R          | 11.8                                           | 11.3           | 10.6          |
| GISS-E2-R-TOMAS    | 10.3                                           | 9.8            | 9.1           |
| HadGEM2            | 11.5                                           | 12.0           | 11.5          |
| LMDzORINCA         | 10.0                                           | 10.6           | 10.4          |
| MIROC-CHEM         | n/a                                            | n/a            | 8.7           |
| MOCAGE             | 8.1                                            | 7.5            | 7.0           |
| NCAR-CAM3.5        | 10.6                                           | 9.8            | 9.1           |
| STOC-HadAM3        | 9.6                                            | 9.5            | 9.1           |
| UM-CAM             | 14.9                                           | 14.7           | 13.9          |
| MMM $\pm$ STD      | 10.0 $\pm$ 1.8                                 | 10.2 $\pm$ 1.7 | 9.7 $\pm$ 1.6 |
| CV (%)             | 18.0                                           | 17.0           | 16.0          |

**Table S4.** Ratio of global total CO, NO<sub>x</sub> and NMVOC emissions in the present day (2000) to those in preindustrial (1850) in the models.

| <b>Models</b>      | <b>2000/1850 Global Total Emissions</b> |                       |               |
|--------------------|-----------------------------------------|-----------------------|---------------|
|                    | <b>CO</b>                               | <b>NO<sub>x</sub></b> | <b>NMVOCs</b> |
| CESM-CAM-superfast | 2.21                                    | 3.85                  | 1.00          |
| CICERO-OsloCTM2    | 2.21                                    | 2.74                  | 1.12          |
| CMAM               | 1.82                                    | 2.77                  | -             |
| EMAC               | 2.38                                    | 3.33                  | 1.29          |
| GEOSCCM            | 2.34                                    | 2.61                  | 1.27          |
| GFDL-AM3           | 2.20                                    | 3.36                  | 1.09          |
| GISS-E2-R          | 2.77                                    | 3.07                  | 1.15          |
| GISS-E2-R-TOMAS    | 2.77                                    | 3.20                  | 1.03          |
| HadGEM2            | 1.75                                    | 3.77                  | 1.52          |
| LMDzORINCA         | 2.69                                    | 3.25                  | 1.18          |
| MIROC-CHEM         | 2.78                                    | 3.27                  | 1.15          |
| MOCAGE             | 2.40                                    | 3.22                  | 1.12          |
| NCAR-CAM3.5        | 2.21                                    | 3.99                  | 1.16          |
| STOC-HadAM3        | 2.41                                    | 2.83                  | 1.26          |
| TM5                | 2.45                                    | 3.02                  | 1.16          |
| UM-CAM             | 2.39                                    | 2.83                  | 1.25          |
| MMM±STD            | 2.36±0.30                               | 3.19±0.41             | 1.18±0.13     |

**Figure S1.** Regional annual mean airmass-weighted OH concentrations ( $\times 10^5$  molecule  $\text{cm}^{-3}$ ) for 2000 simulated by the models in the atmospheric subdomains recommended by Lawrence et al. (2001). Global mean tropospheric OH concentrations (Glob) and the inter-hemispheric ratio (N/S) are shown in the topmost row of each plot.

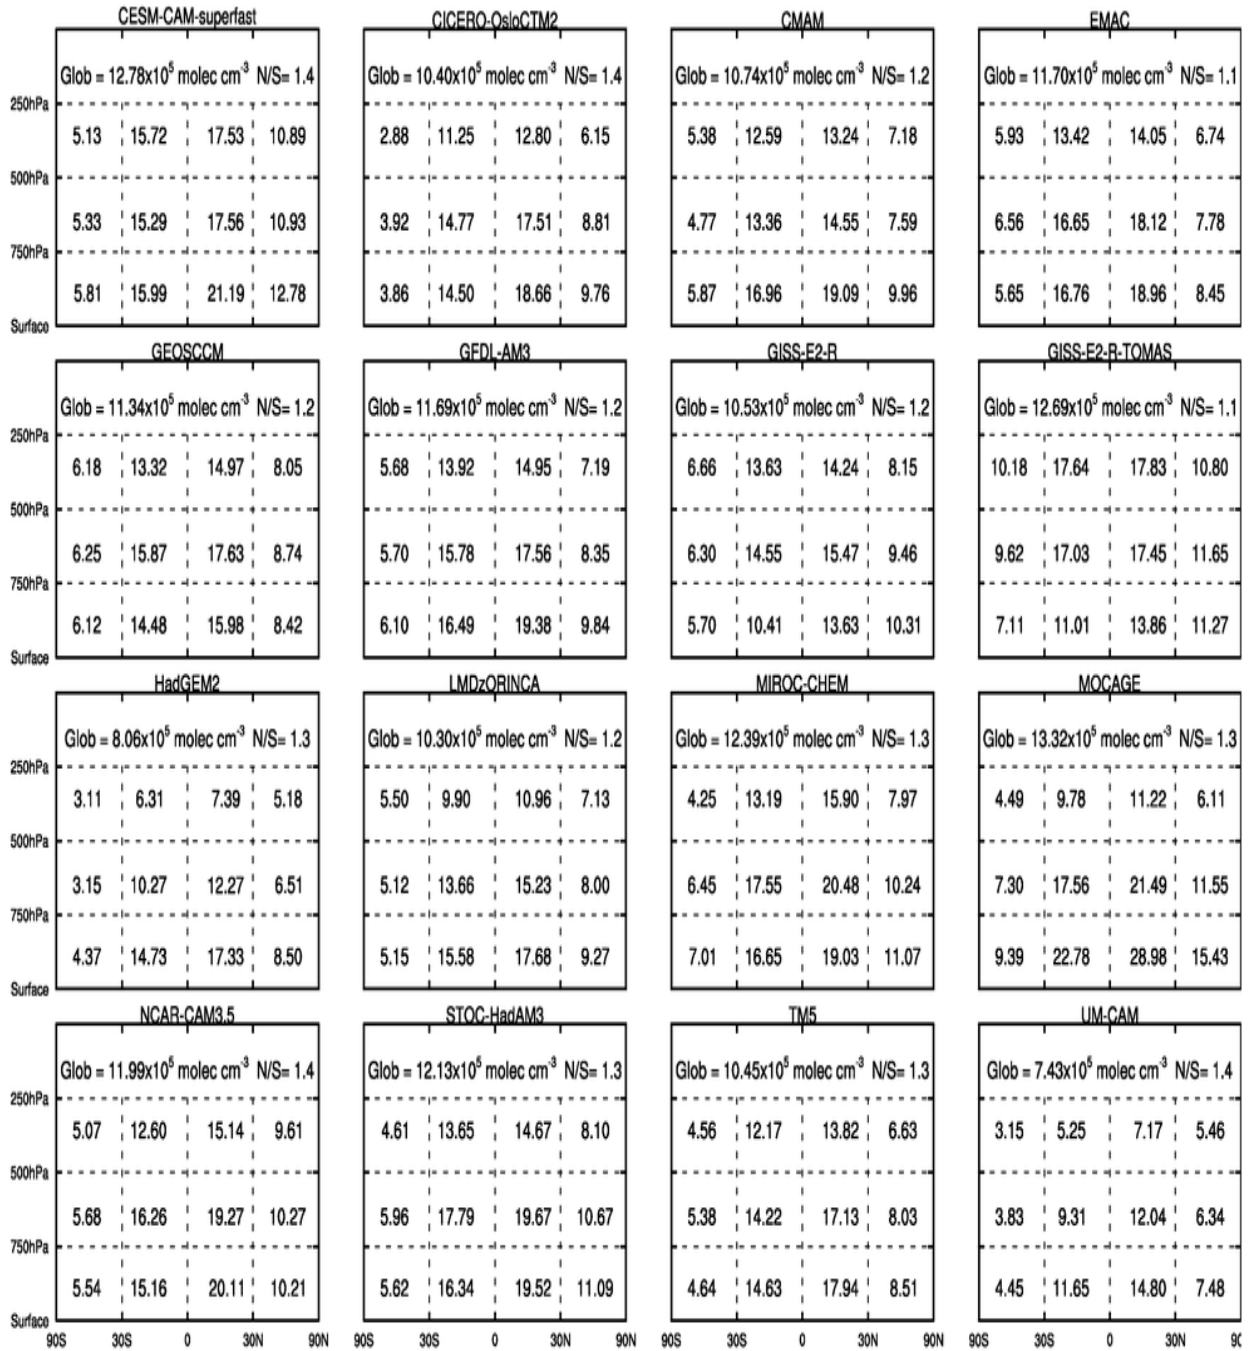

**Figure S2.** Annual cycle of total column ozone biases for 2000 against satellite measurements from the merged Total Ozone Mapping Spectrometer/solar backscatter ultraviolet (TOMS/SBUV) data averaged over the 1996-2005 time period. ENS refers to multi-model mean bias against TOMS/SBUV data.

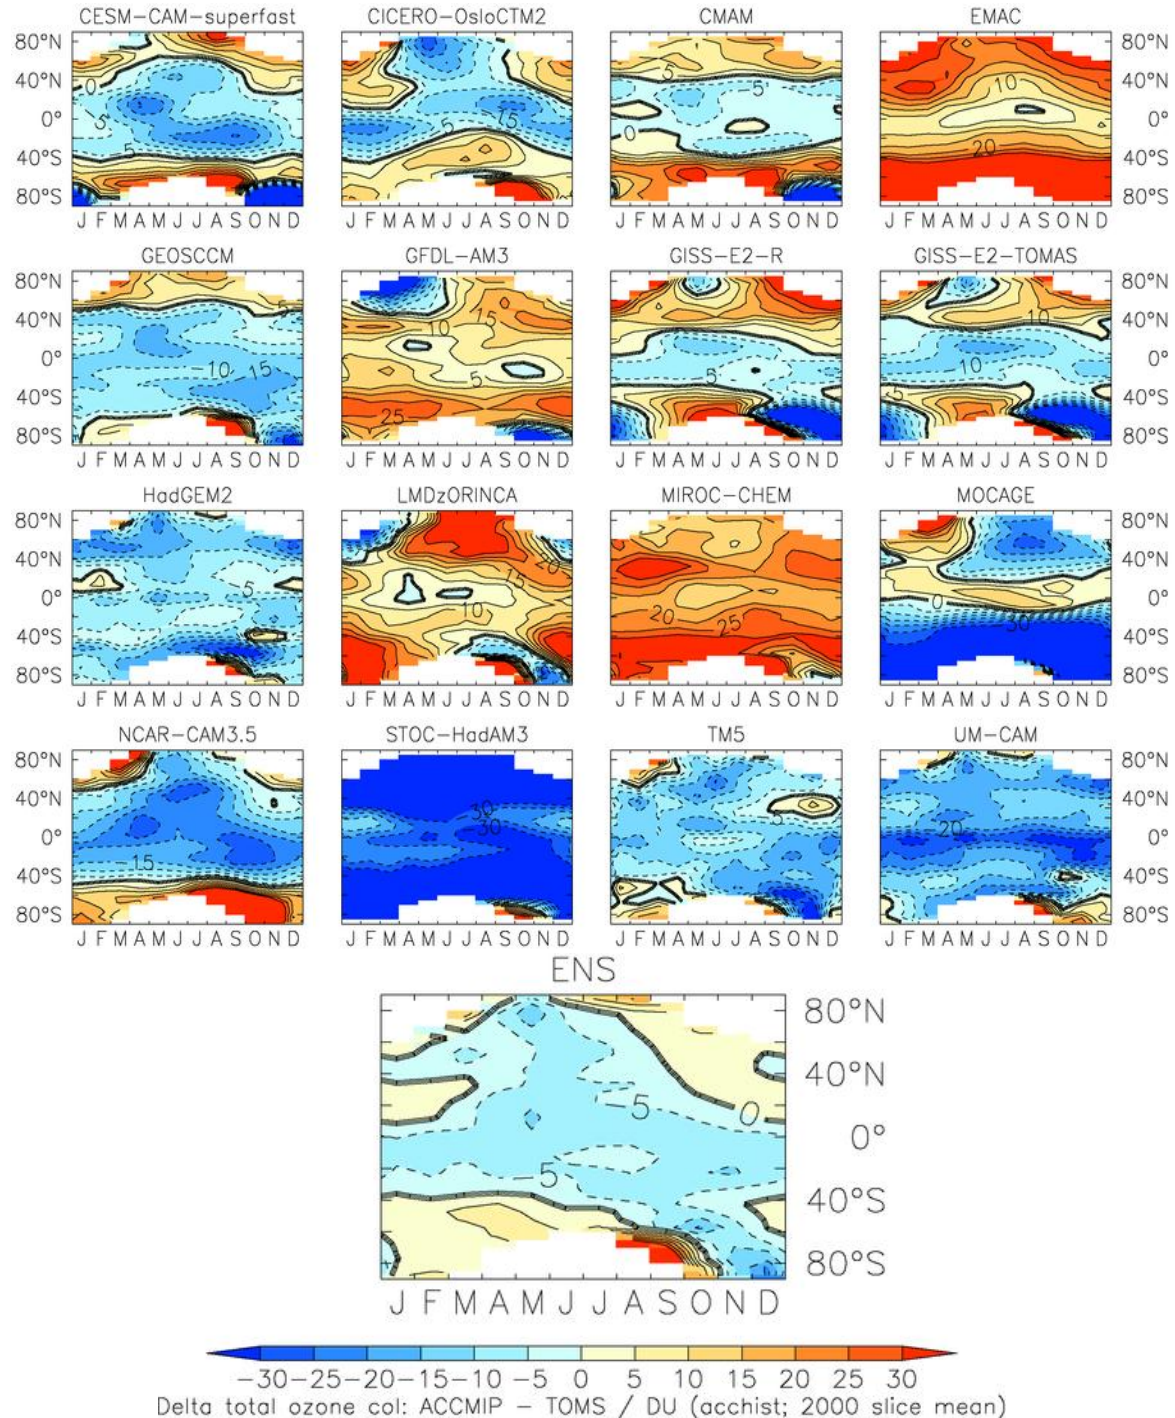

**Figure S3.** Annual average difference between model CO for 2000 time-slice and average 2000-2006 MOPITT (Model-MOPITT) at 500 hPa for individual models. Each model was convolved with the MOPITT operator (a priori and averaging kernels) before taking the difference.

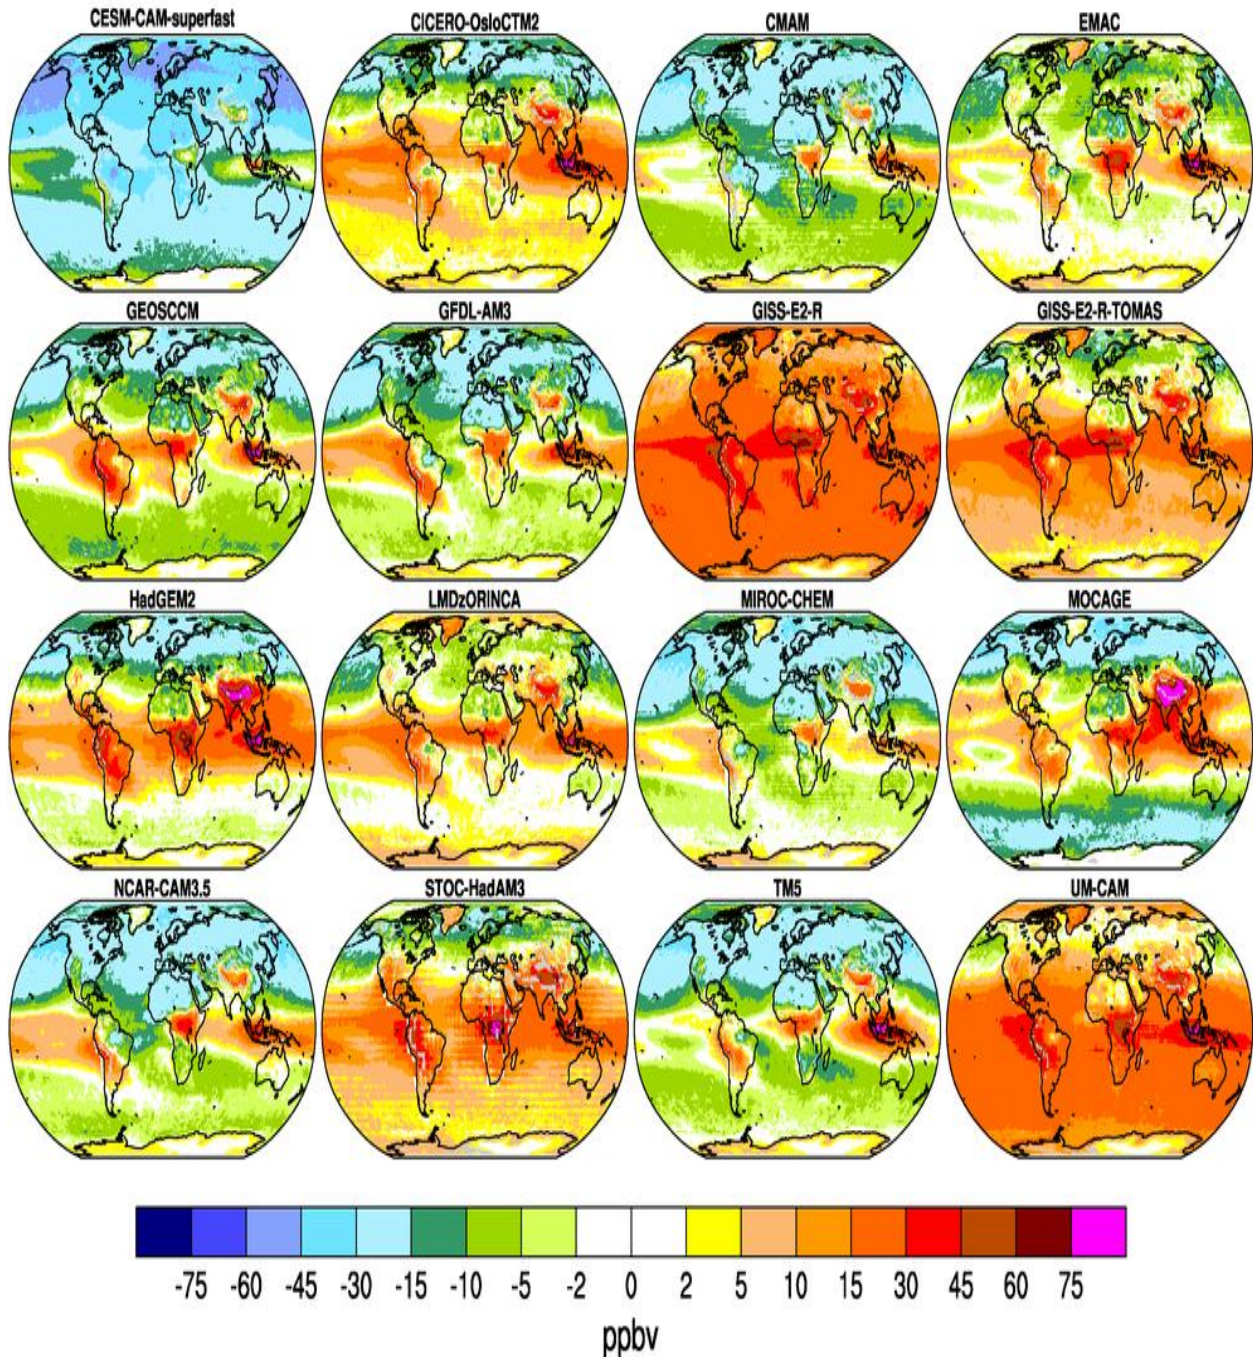

**Figure S4.** Percent change in regional tropospheric OH concentration for present day relative to the preindustrial simulated by each model. OH increases are shown in black and decreases are in red. Southern Hemisphere (SH), Northern Hemisphere (NH) and global mean (Glob) tropospheric OH changes are shown in the topmost row of each plot.

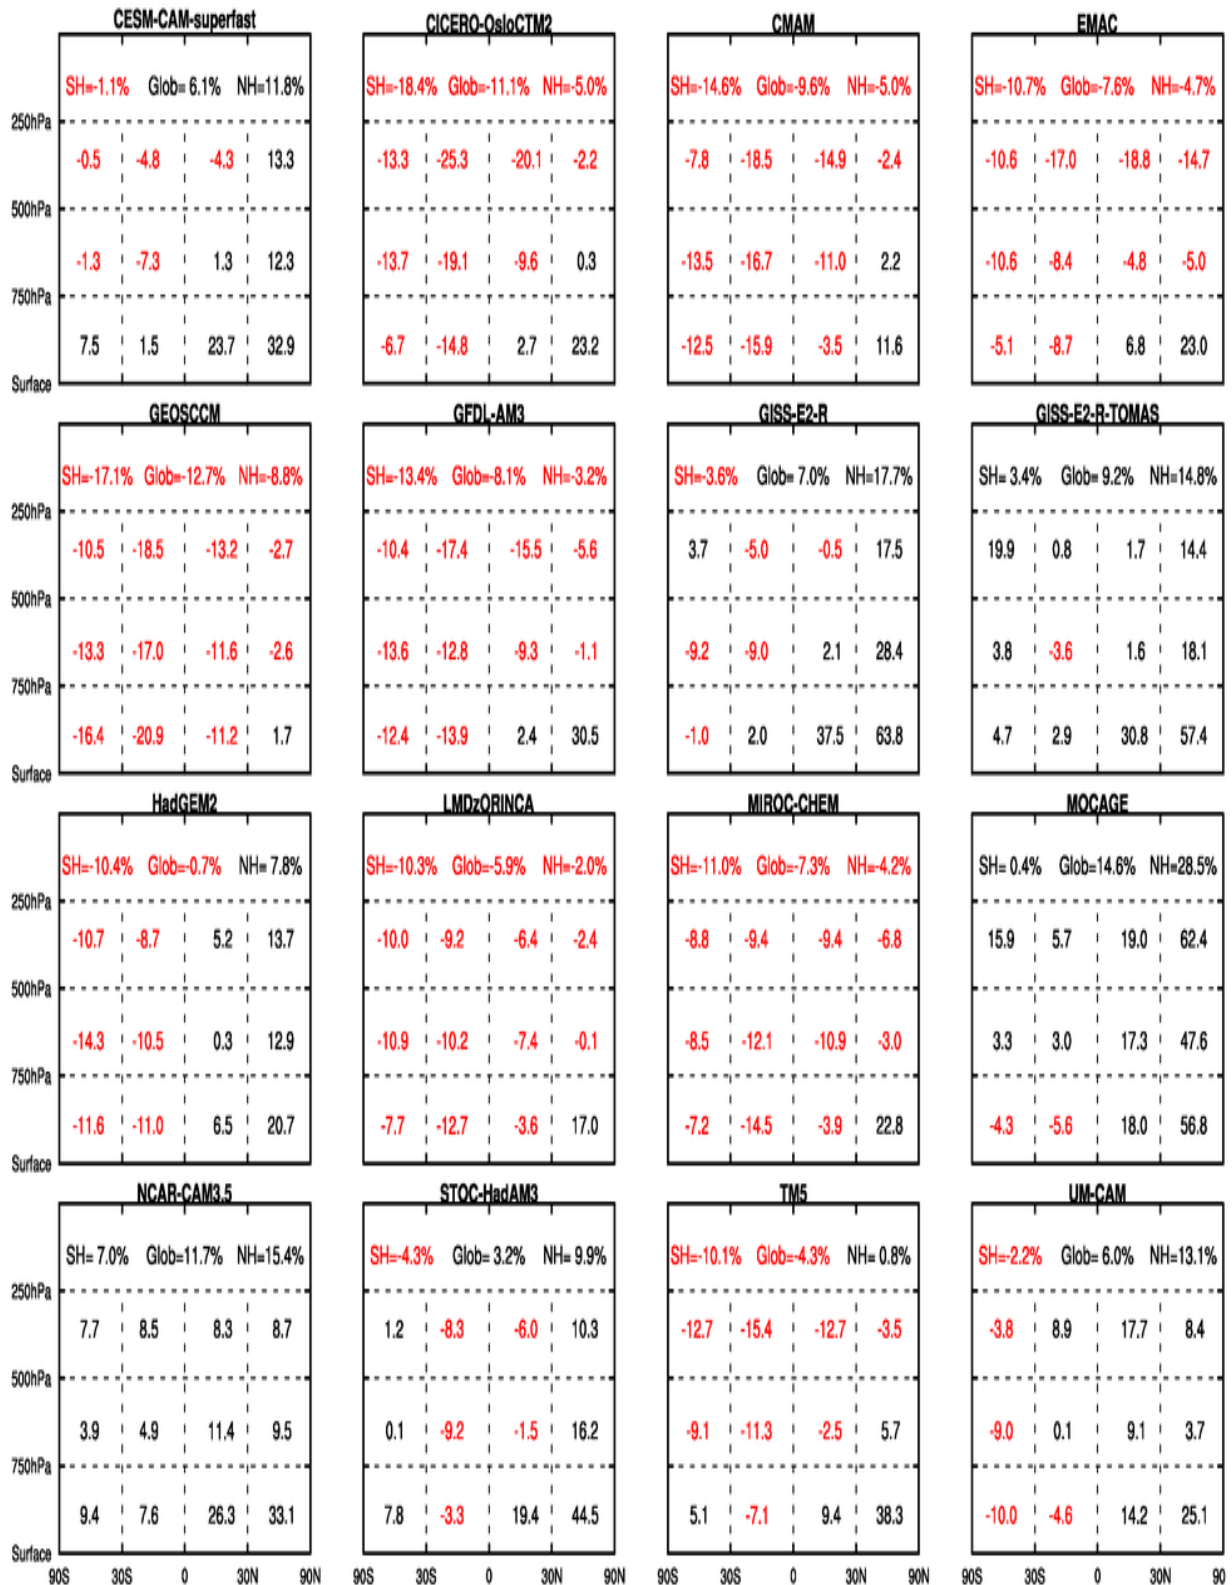



**Figure S5.** Same as in S4, but for percent changes in 2000 relative to 1980.

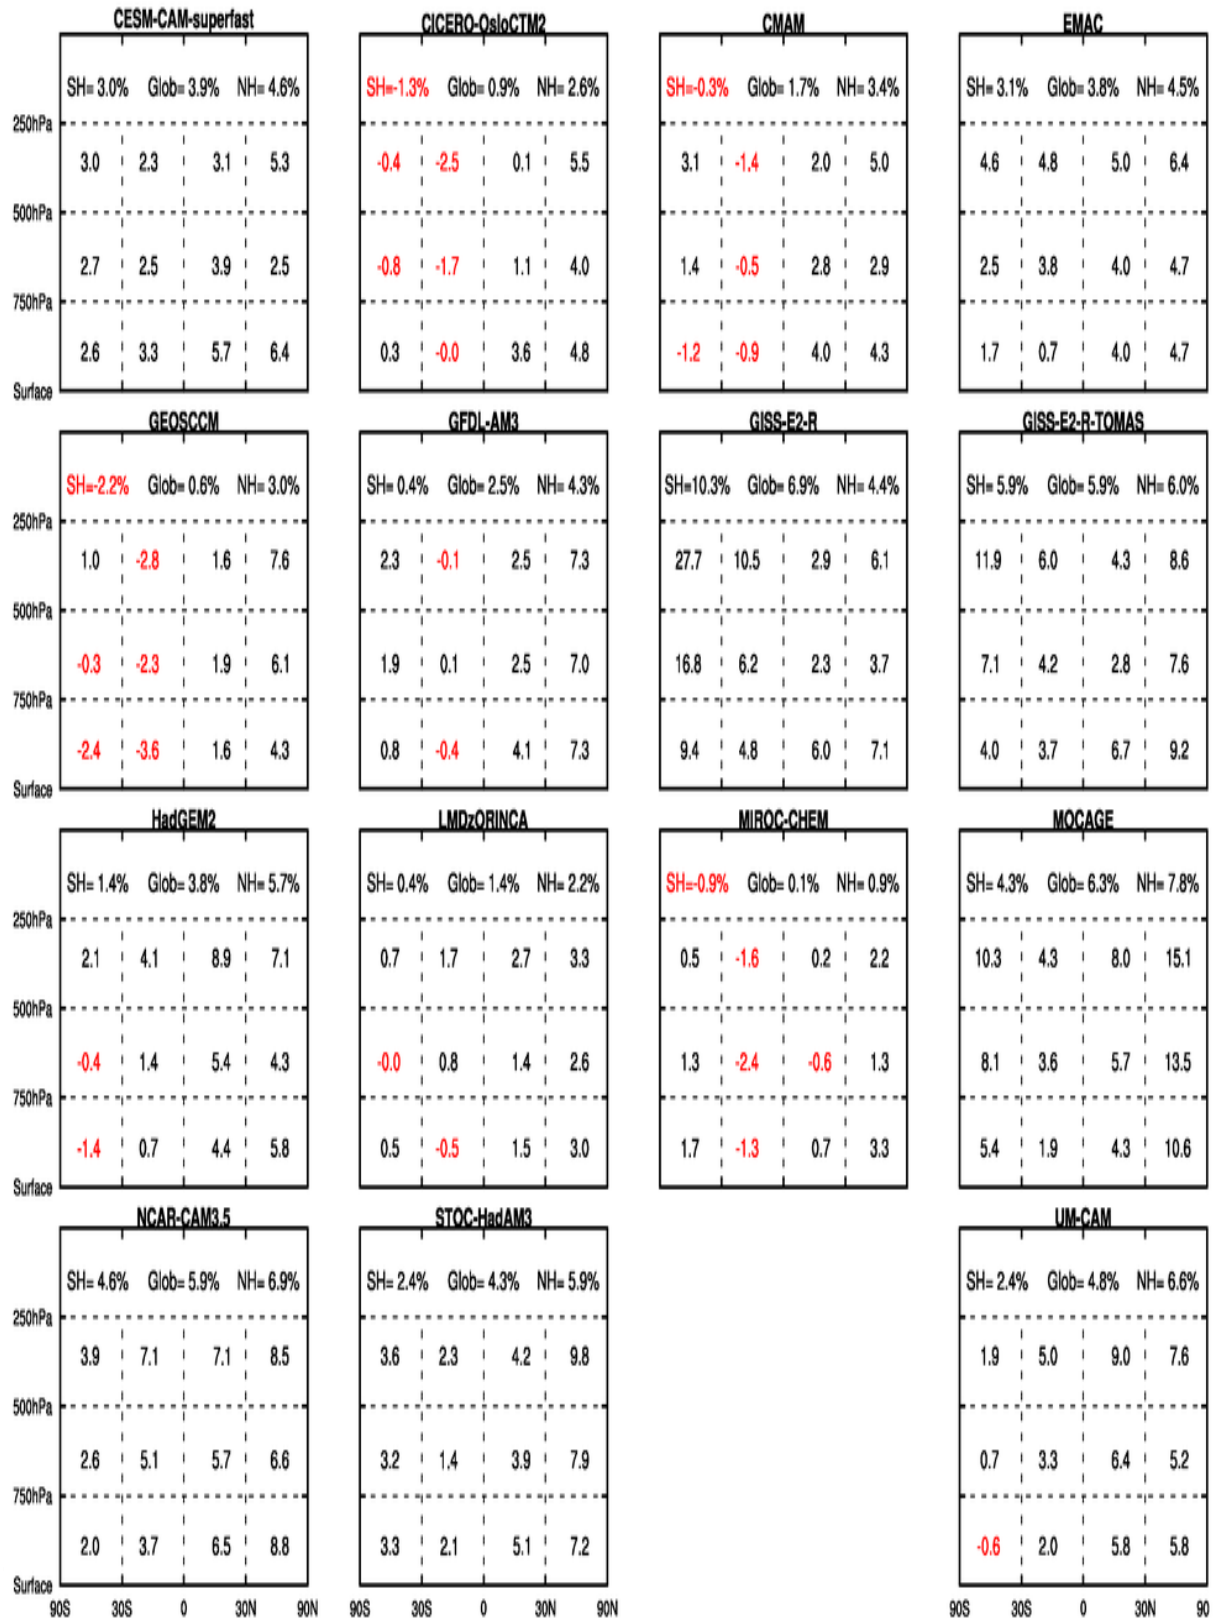

Supplement: Supplementary file [file acp-13-5277-2013-supplement.pdf]
